# Supplementary material for: Mapping ongoing nutrition intervention trials in muscle, sarcopenia, and cachexia: a scoping review of future research
Source: PubMed Central journal article supplement (PMC9178172; doi:10.1002/jcsm.12954), 2022-03-17
Supplement: JCSM-13-1442-s002.pdf [file JCSM-13-1442-s002.pdf]

## Supporting information

### Mapping ongoing nutrition intervention trials in muscle, sarcopenia, and cachexia: a scoping review of future research

*Journal of Cachexia, Sarcopenia, and Muscle*

Camila E. Orsso<sup>1</sup>, Montserrat Montes-Ibarra<sup>1</sup>, Merran Findlay<sup>2</sup>, Barbara S van der Meij<sup>3,4,5,6</sup>, Marian de van der Schueren<sup>5,6</sup>, Francesco Landi<sup>7,8</sup>, Alessandro Laviano<sup>9</sup>, Carla M. Prado<sup>1\*</sup>

<sup>1</sup> Human Nutrition Research Unit, Department of Agricultural, Food and Nutritional Science, University of Alberta, AB, Canada.

<sup>2</sup> Cancer Services, Royal Prince Alfred Hospital, Camperdown, NSW, Australia.

<sup>3</sup> Bond University Nutrition and Dietetics Research Group, Faculty of Health Sciences and Medicine, Bond University, Gold Coast, Queensland, Australia.

<sup>4</sup> Department of Dietetics and Foodservices, Mater Health Services, Mater Hospital, South Brisbane, Queensland, Australia.

<sup>5</sup> Department of Nutrition, Dietetics and Lifestyle, School of Allied Health, HAN University of Applied Sciences, Nijmegen, the Netherlands.

<sup>6</sup> Department of Human Nutrition and Health, Wageningen University and Research, Wageningen, the Netherlands.

<sup>7</sup> Department of Geriatrics, Neurosciences and Orthopaedics, Catholic University of the Sacred Heart, Rome, Italy.

<sup>8</sup> Geriatric Department, Fondazione Policlinico Universitario "Agostino Gemelli" IRCCS, Rome, Italy.

<sup>9</sup> Department of Translational and Precision Medicine, Sapienza University of Rome, Rome, Italy.

#### Corresponding author

Professor Carla M. Prado, PhD, RD  
2-021 Li Ka Shing Centre for Health Innovation  
University of Alberta  
Edmonton, AB, Canada T6G 2E1  
Tel: 780.492.7934 / Fax: 780.492.9555

## Supporting information

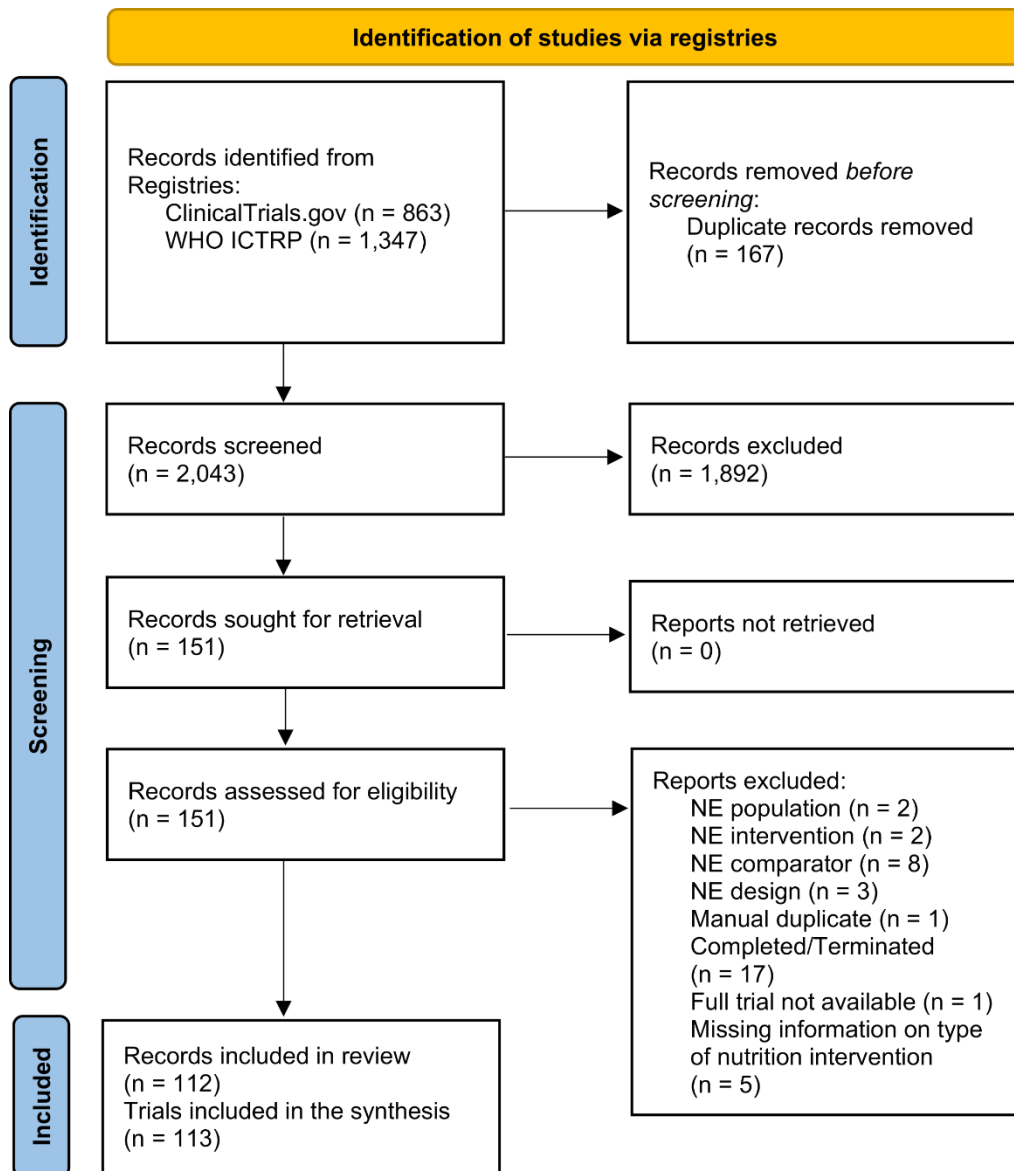

**Figure S1** – PRISMA Flow Diagram for Systematic Reviews of Databases and Registers [42,43]. Note one included trial reported two separate studies, hence N = 113 included trials. Abbreviations: NE, not eligible; WHO ICTRP, World Health Organization International Clinical Trials Registry Platform.
